# Supplementary material for: From Migrant to Transnational Families’ Mental Health: An Ethnography of Five Mexican Families Participating in Agricultural Labour in Canada
Source: MDPI journal article supplement (doi:10.3390/socsci12090523), 2023-09-19
Supplement: s1 [file s1]

**Table S1.** Participants' extended original quotes in Spanish

**a. SAWP WORKERS**

Q1: "Es que es una mezcla rara, uno es fuerte para venir aquí y dejar los hijos, digo se necesita mucho valor para hacer lo que hacemos... pero dentro de nosotros... hay mucha fragilidad, porque está la duda de ¿valdrá la pena? ¿Cómo va a estar mi hija? ¿La van a cuidar bien? ¿Regresaré con bien? ¿Me irá bien? ¿Cumpliré el objetivo? Hay dudas, hay miedos. Y la mayoría de las mujeres tenemos una historia bien cabrona ¿no? Emocional, de afectos, entre mujeres golpeadas, abandonadas, engañadas, violadas, y pues venimos cargando todo ese historial." María Jesús, worker, F3

Q2: "Cuando empecé sólo vine dos meses y 15 días, y ese año sí me enfermé de los nervios y fui al hospital. Empecé que me dolía la cabeza, después me empezó a doler una muela y me la quitaron porque estuve picando con cosas, me la infecté. Pero fue de nervios, de que nunca me había separado de mis hijos. Fue de nervios porque el médico me dijo que no estaba picada ni nada, pero como yo me la estuve lastimando, hice una gran infección y me la tuvieron que sacar luego, luego. Yo estaba triste, nerviosa, tensa, preocupada, porque era el primer año que yo dejaba a mis hijos. Se me hicieron una eternidad... Yo como al mes le decía al patrón que yo me quería regresar. Y él me veía llorar y me decía que si yo estaba triste, que si yo extrañaba a mis hijos, y le dije que sí, y dijo que sí, pero que él ahora tenía mucho trabajo, que tal vez en un mes o mes y medio yo me iba, y en mes y medio me mandó para México. Sí, y para todos es lo mismo, tanto para hombres como para mujeres, es difícil la primera temporada. Yo he visto compañeras que vienen por primera vez así como que tristes, angustiadas, preocupadas. Pero siempre, pues de las que ya tenemos más tiempo, y a mí me paso cuando yo vine el primer año venían compañeras y ellas decían, 'ahorita estás así, pero te vas a acostumbrar'. Y uno piensa que no, porque en ese momento pues uno trae pues el corazón deshecho por pasar a dejar a las personas que uno quiere, a las familias, a los seres queridos, ¿no? Y sí, es muy difícil." Isabel, worker, F4

Q3: "Tal vez ahorita se me está maximizando más este asunto de la soledad, ya es cuestión emocional, personal. Yo la he sentido ahorita, ya más fuerte. La soledad que te da la ausencia, la lejanía... al menos a mí sí me está doliendo, el asunto de la soledad." María Jesús, worker, F3

Q4: "Mi felicidad la podríamos definir de muchos términos, no solo del lado económico, sino el sentirme bien, el sentirme plena o el estar tranquila, también es una parte de la felicidad. Y el tener salud, cuando yo estaba enferma yo no estaba feliz, yo estaba como en una desesperación... decía, '¿y si me muero? ¿qué va a pasar con mi hija que está chiquita?' Yo pensaba en mi nena, mi chiquita es tan pequeña, piensas en muchas cosas y me da como tristeza e infelicidad." Leti, worker, F2

Q5: "Yo me canso más allá en México, los cuatro meses que yo estoy allá me dan las siete de la noche, ocho, y ya me voy a acostar, rendida. Soy mamá, tengo que cocinar, tengo que lavar, tengo que trapear, tengo que ver los asuntos, que tengo que hacer pagos de esto, que tengo que ir a aquello, o sea, todo. Entonces juego muchos papeles, educo a la niña, juego con la niña, educo al hijo, platico con el hijo, tienes que ser hija también, porque tienes que ver a la mamá que se siente enferma, que le llevo al doctor, que mi papá, o sea... Allá juegas todos los papeles, que aquí en ocho meses no los juego, o sea sólo me hablan por teléfono, 'hija que me siento mal,' 'sí, le pongo dinero y váyase al doctor,' pero yo no sé ni quién la llevó, no estoy al tanto de sus medicamentos, o mi hija se enfermó, y pues 'sí, denle su medicamento,' pero si yo estoy allá, yo lo tengo que hacer. Sí, entonces yo termino cansada. O sea, lo disfruto, pero sí termino cansada, y ya no tengo tiempo para mí, ya no tengo tiempo de hacer ejercicio, no tengo tiempo de salir a correr, ya no tengo tiempo de, 'ah, me voy a poner una mascarilla en la cara, o de pintarme las uñas. Yo me siento muy cansada allá, y no duermo bien... porque duermo con mi hija, se para, viene, me jala mis cabellos, me destapa, y tengo que estar pensado, que sí ya se durmió, que sí se destapó, o que mi hijo son las 10 de la noche y no llega... y no puedo dormir porque no está mi hijo. Y acá yo duermo solita, sí, sí, pienso que tengo que llegar a casa, que tengo que descansar, porque al otro día tengo un trabajo que me espera, pero duermo, yo, duermo más aquí en Canadá que allá en México. O supongamos, un sábado que no trabaje, todo el día me la puedo pasar acostada." Leti, worker, F2

Q6: "Las mujeres en el PTAT procuramos aprovechar el tiempo perdido, y los tres, cuatro meses que estemos en México, tratar de hacer lo que no hicimos en ocho meses... y entramos en una angustia terrible. Porque cuando yo ya estoy a días de venirme, 15 días, ocho días, voy con la terapeuta de hija, planeo con ella porque ya me voy, y me pregunta '¿cómo vas? ¿cómo estás?' 'Estoy angustiada porque veo en hija señales, me voy preocupada por mi hija, me voy preocupada por mi madre que está enferma, me voy preocupada por mi papá con este detalle, mi hermano que este problema...' Dice, 'a ver, espérate, lo que tú hiciste en cuatro meses, lo hiciste, es el tiempo que la vida te ha dado para estar, para resolver o no resolver, para disfrutar o no disfrutar con tu familia y con tu hija, lo que no hiciste o lo

---

que no puedes hacer, es eso, no lo pudiste hacer porque tu tiempo solamente son cuatro meses en México y acaba de aceptar eso. O sea, fuiste madre al 100%, física, espiritual y emocionalmente cuatro meses, en esos cuatro meses hiciste esto, esto, esto, y esto, viste esto, esto, esto o lo otro. Ahí quédate. Si te vas a Canadá otra vez, tomas la decisión de irte nuevamente, entonces bueno, pues ya desde Canadá harás lo que siempre has hecho, llamadas por teléfono, aprovecha la tecnología para que hagas video-llamada, y trates de sanar esa angustia y esa preocupación con la que te vas.' Por eso me decía la terapeuta, 'lo que resolviste y lo que hiciste, ya estuvo, fueron cuatro meses, no puedes hacer, ni ver, ni tener, porque tú no estás 12 meses aquí.' Me puso en mi lugar, y me dolió, pero me dolió mucho, es cierto, soy madre cuatro meses, la realidad es que sigo siendo madre pero de una manera extraña, diferente, en donde me hace perder más que ganar, lo único que gano es dinero, pero pierdo más." María Jesús, worker, F3

---

Q7: "María Jesús aquí en México ha venido a revisarse ginecológicamente, porque allá en Canadá tuvo un problema de menstruación ... Viene acá y, 'pues ahorita tengo que aprovechar para ir al médico, a este, al otro,' y entonces todo lo tiene que hacer aquí en tres meses." Valentina, friend, F3

---

Q8: "Antes era otra historia porque era poquito tiempo, no se sentía tanto, era menos, apenas ni te acostumbras a la vida de acá Canadá que ya tienes que regresar a la que tenías antes, o sea no es tan dramático el cambio. A diferencia que muchos meses ahora es más tu vida acá en Canadá que allá en México, entonces llegas allá y, como diría alguien, no somos ni de aquí ni de allá. ¿De dónde somos? No lo sé... (risas) Yo quisiera ser de allá México, pero desgraciadamente creo que somos más de acá Canadá. Son cambios para la salud de uno. Sí, por un lado, te sientes feliz emocionalmente, contenta por otro lado te vuelven las enfermedades, que te cae el cabello, a mí mi estómago ya me duele, me tengo que volver a acostumbrar a la comida, así son muchas cosas." Leti, worker, F2

---

## **b. THE WORKERS' CHILDREN**

---

Q9: "Cuando no está, pues me siento sin ganas... como que siento que mi mamá no está, como que me abandonó, siento eso." Santiago, son, F5

---

Q10: "No he estado sola pero pues sí me las he visto un tanto oscuras por estar todo el tiempo pensando que no tengo a mi mamá, yo de pronto sentía pues que nadie me escuchaba, pues yo lo sentía así, no sé era como la niña que todos tenían que cuidar porque su mamá no estaba, y yo no quería que me vieran así, a mí lo único que me importaba era estar con mi mamá." Alexa, daughter, F3

---

Q11: "Pues igual estuvimos con otra tía, y pues ella tenía más hijos, y no estábamos en nuestra casa, pues era un poco incómodo el convivir con nuestros primos. A veces estando en tu casa pues haces las cosas, porque dices, pues porque es mi casa lo hago, y a veces lo hago y a veces no lo hago, pero en una casa ajena, mi mamá siempre nos ha educado que uno tiene que ayudar a hacer las cosas, a no agarrar nada, porque es casa ajena no es la casa de uno, siempre nos ha acostumbrado así ... Y ya después de unos años ya no nos queríamos quedar con ninguna de mis tías, ya nos quedamos en mi casa solos y pues yo hacía de comer, yo era la mamá (risa)." Nicole, daughter, F4

---

Q12: "No, no es muy fácil, porque la verdad sí me hace falta, pero pues no queda otra más que, que esperar a que regrese, a que regrese con bien, y si se va es por algo, para que nos dé una mejor vida a mí y a mi hermana ... cuando uno es niño, pues todos se olvida, pero como va creciendo y se va dando cuenta de las cosas, pues se va sintiendo más feo." Alejandro, son, F2

---

Q13: "Estuve muy tranquila viviendo con mi tía, fue cuando mi relación con prima y primo era como más junta, más cercana, igual con mi tía. En ese tiempo estaba en quinto y sexto de primaria, y creo que fue una época bonita de mi vida, me la pasaba bien, tenía muchos amigos, como que no me afectaba tanto, ya cuando regresaba a mi mamá a veces sí era un problema porque ya me venía a vivir para acá, y la distancia de aquí a la escuela que estaba algo lejos y eso. Sí, a veces cuando regresaba me molestaba como que me movieran otra vez de lugar, entonces pues sí, eso fue algo que siempre me molestó, entonces siempre fue muchos cambios de estar viviendo con mi tía, con mi papá, un tiempo solamente unos meses, tres meses en otro estado." Alexa, daughter, F3

---

Q14: "Yo créeme que quisiera estar así con mi mamá, venirla a ver, decir, 'este fin de semana voy a ir con mi mamá, o vamos a ver con mi mamá esto o lo otro,' la diferencia es que está los cuatro meses y pues vamos acá y vamos allá, o esto y lo otro, entonces pues es aprovechar mi tiempo con mi mamá, y así siempre ha sido desde que ella se va a Canadá... Estando mi mamá yo ya no salía a ningún lado, mi mamá era mi mundo. Y es lo que me decía mi mamá, 'es que yo no entiendo porque cuando yo no estoy sales, vas, vienes, y yo estoy y ya no,' y le digo, 'pues porque lo más importante ya lo tengo en mi casa, y no estando tú, pues me da lo mismo estar o no estar.' ... Sí, es el cambio que está mi mamá y yo quiero aprovechar mucho, salir, jugar con ella, platicar, todo, y ya estando allá... igual estando allá sí la busco y todo, sí platico con ella y le platicó cosas y todo, pero no es lo mismo que hable una hora o media hora a que pues ella está en el día y desayunamos juntas, comemos juntas, que luego, 'quiero ir a tal lado,' 'ándale, yo te llevo,' o

---

---

que esto, que lo otro, que se siente mal, me la llevo al doctor. Es muy diferente, por eso dicen mis amigos, 'ya sabemos, que llega tu mamá y ya no sales con nosotros,' y les digo, 'por eso hay que aprovechar los ocho meses.' (Risas)" Nicole, daughter, F4

---

#### **c. CAREGIVERS OF THE WORKERS' CHILDREN**

---

Q15: "Esa vez cuando ella Leti se fue, yo me recuerdo muy bien, salió llorando cuando me entregó a su hija, y me dijo, 'pues te la encargo mucho, cuídala,' en ese tiempo yo también tenía a mi niño, que él tenía cuatro meses, se llevan por cuatro meses. Entonces yo le dije, 'no te preocupes hermana yo te la voy a cuidar, no tienes porque irte con esa pendiente,' y entonces con decirte que la cuidaba más que a mi hijo (risas), mi esposo decía, 'no, es que debes de tener cuidado, que no sé te caiga ni nada, no, es que cuídala...' Porque teníamos esa responsabilidad, porque tu hija, pues ya lo viste que se cayó, pues la levantas y ya la estás sobando, pero era la sobrinita y eso era más responsabilidad yo sentía... y no se fue por mucho tiempo, se fue por dos meses. Entonces dije, 'bueno ok, son dos meses, yo te la cuido,' pero si hubiera sido ahorita que son ya ocho meses, no, ¡olvídate!, era mucha presión para mí tener a los dos pequeños, pero ella era la de más cuidados, porque ella estaba la más grande, y ya empezaba a caminar, gatear, y entonces ya era un poquito más difícil." Luna, sister, F2

---

Q16: "Estaba mi sobrino cursando el tercer año de preescolar, y entonces le comentaron a mi hermana que él no estaba preparado para pasar a primaria, y entonces mi hermana, 'ya lo inscribí en la primaria, pues se queda así,' y entonces le digo, 'antes de que salga de kinder, mejor lo regresamos para que no hagamos los papeles,' y entonces mi hermana dijo que no, que mejor se quedará así. Y entonces... me tocó llevarlo a mí a su terapia, y entonces platicando con la doctora de lenguaje yo le comenté eso, 'bueno es que fíjese que la maestra de primero le comentó esto a mi hermana,' y entonces ella habló con la de aprendizaje, habló con la psicóloga, y entonces me dice, 'a los ocho días vienes y pagas tu evaluación para que lo valoren,' y a los ocho días de eso, me dijeron, 'sabes que, él todavía no está preparado para pasar a primaria.' Entonces fui y hablé con la maestra de primero de primaria, y me dijeron, 'no tenemos maestro de reserva,' pero es que me dijeron que todos los estados tienen que tener un maestro de reserva, dice, y si tienen un maestro de reserva, pues... que se quede en primaria, ¿no? Y entonces me dice, 'vienes mañana a hablar con el director,' pero también el director era una persona que no se presta para hablar, y entonces cuando yo fui al otro día y me dijo no, de plano no, que no entraba, y entonces pues ya lo regresé. Y entonces como que lo regreso, no lo regreso, y sí mejor lo meto acá, y si mejor lo meto allá... y entonces, pues como que ya con la psicóloga, ya le dije, 'ahora sí quiero que usted me apoye, ayúdeme a tomar decisiones por él.' Pues sí, 'ya te estábamos diciendo que no pase,' y entonces ya hablé con la maestra de kinder, y pues si ya te dieron una evaluación, pues lo regresamos ... y entonces ya se hizo todo el papelerero." Aitana, sister, F2 (ECI)

---

Q17: "Si no estamos los dos malos, yo lo puedo hacer, yo le hago su licuado o le caliento su leche o así, y por ejemplo si mi esposa está bien, ella es la que se levanta y se para a hablarle para que ya desayune y eso, pero pues mi hija la que está aquí cerca, si ella mi esposa está con un medicamento o yo estoy con un medicamento, ella mi hija viene y le habla, 'sabes qué Santiago, necesitamos que ya te pares, te vas a ir a la escuela.'" Rodrigo, father, F5

---

Q18: "Para mí sí me fue de la fregada el año pasado, porque aunque fueron dos meses que me dejaron a los niños, me enfermé de gripa, de estrés... sí, fue un año difícil para mí. Se fue mi hermana Leti y me quedé con los hijos, con mis sobrinos, tenía yo un trabajo, trabajaba dos días a la semana, y se me complicó un poquito, porque me dio gripa y luego llegó un mes y no se me podía quitar, y estuve faltando una, dos semanas al trabajo, me estaba dando estrés... Estoy yendo a una doctora acupunturista, y fue cuando ya me dijo que era estrés." Aitana, sister, F2

---

Q19: "Ella Camila llega y es la que ejecuta todo, es la que organiza todo. Esta niña Juana ahorita es el centro de atención, ella dice qué va a hacer, qué no se va a hacer, en cuestiones de comer, en cuestiones de todo, y cuando ella Camila llega, esta niña se convierte en una hija, ella no hace nada. Sí, en comida, en la ropa, ella Camila le lava todo a las niñas nietas. O sea, si vamos a salir algún lugar ella decide cómo y qué se va a hacer. Ella Juana se deja querer, Camila le dice, 'ya sabes qué, ya trabajaste ocho meses, me toca a mí, déjame hacerlo, porque me siento inútil si no lo hago.'" José Luis, husband, F1

---

Q20: "Aquí lo malcriamos a mi sobrino, o lo tratamos de ver, pero ya cuando llega su mamá ya le quiere someter a sus reglas, a lo que ella dice, y ya no, pues no, 'sabes qué, yo estoy en la casa con mis papás, abuelitos, y ya estamos así.'" Luna, sister, F2

---

#### **d. EXTENDED FAMILY MEMBERS**

---

Q21: "Lo que más duele al principio de los años es que, pues se va mamá Camila... el día en que se va es cuando lloro y me arrepiento porque no la aproveché." Adriana, granddaughter, F1

---

---

Q22: "Al principio lo tomé muy mal, porque yo pensé que iba a ser pues como esos casos de personas que se van y ya se quedan allá, hacen su vida completamente vienen una vez al año y se vuelven a ir, entonces cuando me platicaron que era solamente por periodos de tiempo y que ella regresaba unos meses aquí, la primera vez yo pensé que era una única vez que se iba a ir y ya no se iba a volver a ir, entonces cuando me explicaron la verdadera forma, el verdadero método, sí me quedé un poco más tranquilo porque yo pensé que ya no la iba a ver para casi nada, pero pues las primeras veces cuando me decía, 'me tengo que volver a ir,' pues sí era así como, pues como esa presión en el pecho o algo así, preocupación, tristeza, dolor, y pues a pesar de que ya estamos un poco más acostumbrados y ya sabemos que regresando pasa unos meses aquí y luego se vuelve a ir, a pesar de que ya estamos acostumbrados, creo que no deja de ser más difícil, son momentos tristes." Daniel, nephew, F3

---

Q23: "Era el cumpleaños de mi mamá, porque fuimos a comer y todo eso, pero toda la familia tenía como este aire abatido, porque mi tía María Jesús siempre pone una especie de alegría. Entonces era, una que no estaba mi tía, y otra que de por sí que todos estábamos tristes porque no estaba. No lo sé, creo que nunca había pasado eso de estar en un cumpleaños y que se sintiera una especie de ambiente abatido." Daniel, nephew, F3

---

Q24: "Es triste porque mi esposa, Nicole sí lo resiente mucho el cambio, que mi suegra está aquí cuatro meses y ya el último mes ya nada más está de que 'ya me voy, ya me voy, ya me voy.' Pues sí, Nicole lo resiente mucho, 'y es que mi mamá casi no está conmigo, y es que esto y es que lo otro,' y pues se pone muy triste, es como yo una vez platicaba con mi suegra Isabel, 'es que usted se va y me deja a Nicole en el suelo, y yo la tengo que volver a levantar, eso es algo que usted no se pone a ver,' y yo entiendo que se tiene que ir, o se quiera ir, yo no sé qué motivos tenga, cuáles serán las presiones, pero a mí sí me da mucho coraje porque a mí a Nicole me la deja derrotada, y yo soy su marido y siempre voy a estar para ella y siempre que se caiga yo la voy a levantar. Y ya fue cuando yo lo hablé con Nicole y me dijo, 'no, no le tienes que decir esas cosas a mi mamá porque, si de por sí se va mal y luego si tú le dices eso, pues se pone un poco más mal,' y ya de ahí hablé con mi suegra, y o sea llegamos a un entendimiento de esta parte, ella me entendió a mí y yo la entendí a ella." Pablo, son-in-law, F4

---

Q25: "Normalmente es como que mi mamá sí me escucha, pero como que está y no está... y cuando está mamá Camila, nos dice, 'vamos a tal lado, es que me invitaron,' 'pues vamos,' o 'vente, ayúdame a hacer esto,' 'vale,' o lo otro, y me dice, 'vénganse, vamos a dormirnos juntas,' 'sí,' 'vamos a ver una película,' sí." Adriana, granddaughter, F1

---

Q26: "Yo platicaba este año con mi suegra Isabel, 'es que me molesta que usted se vaya, y ya como se va, regresa y quiere imponer su ley, de que vamos a hacer esto, vamos a hacer lo otro, y pues sí, obviamente está esperando todo el año a estar con su familia, pero es que usted tiene que entender que ya no nada más es su hija Nicole, ya no nada más es su hijo, ya también está su nuera y yo que soy el esposo de su hija. A lo mejor de cierta forma sí se imponía a ellos sus hijos y sí accedían porque ya sabían que usted venía y pues ya, pero para mí es difícil cambiar toda mi rutina e incluirla a usted, nada más porque usted ya vino.' O sea me es difícil, cuando está mi suegra. Mi esposa sale más porque mi suegra tiene muchas amistades, entonces pues, Nicole siempre la anda acompañado... Entonces luego yo llegaba de trabajar y no le encontraba, y no me molestaba, pero sí no se me hacía justo porque Nicole me acostumbraba, a lo mejor hasta es mi culpa, que pues, yo llegaba y ella estaba, y me decía, 'no, pues necesito que me ayudes a esto,' y de repente que me diga llego en media hora, estoy aquí con mi mamá, y sí, como que cambia toda tu rutina, es por eso que te digo que sí, sientes el cambio." Pablo, son-in-law, F4

---
